# Supplementary material
Source: Springer Nature journal article supplement (https://www.springermedizin.de/resource/supplementary/13020_2013_207_MOESM4_ESM.pdf/9641206)

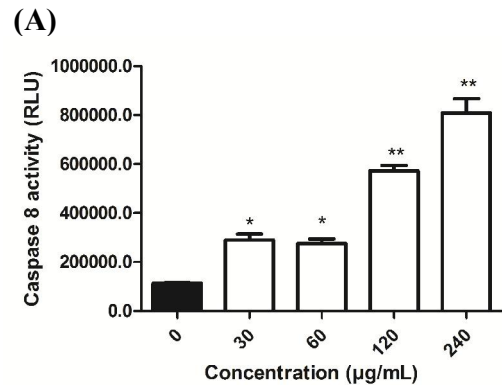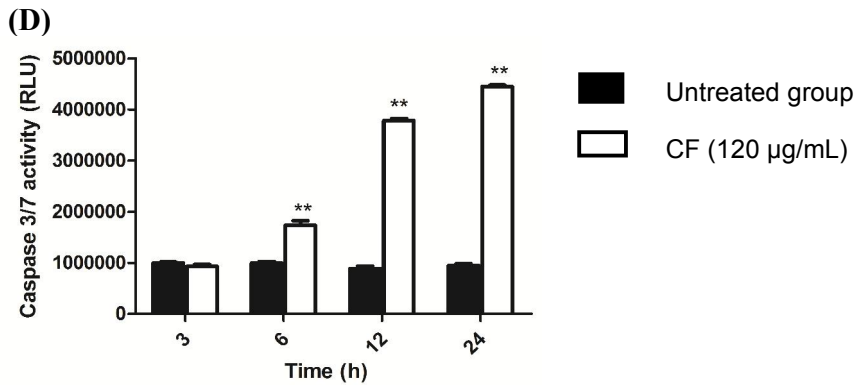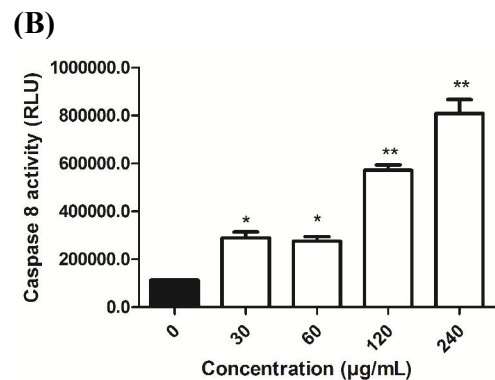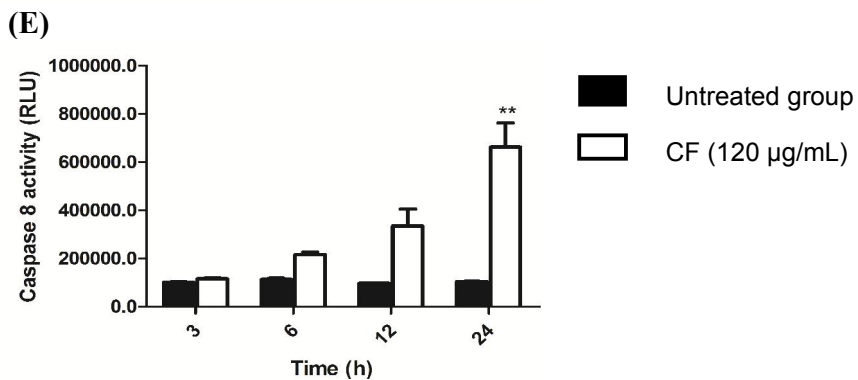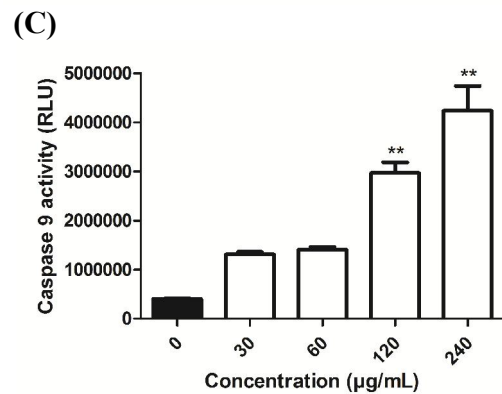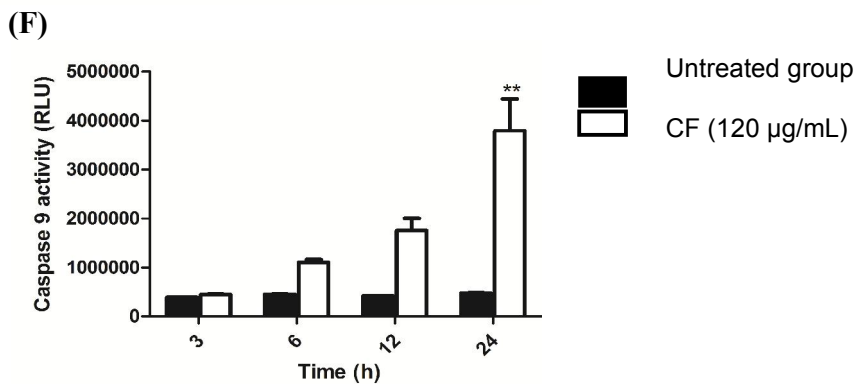

Supplement: MOESM4 [file 9641206]
